# Supplementary material for: Hydrogen bond breakage by fluoride anions in a simple CdTe quantum dot/gold nanoparticle FRET system and its analytical application
Source: Royal Society of Chemistry journal article supplement (doi:10.1039/c0cc05389a), 2011-01-01
Supplement: c0cc05389a.pdf [file c0cc05389a.pdf]

1 **Electronic Supplementary Information (ESI)**

2 **Hydrogen bond breakage by Fluoride anion in a simple CdTe quantum dot/Gold**  
3 **nanoparticle FRET system and its analytical application**

4 Mei Xue, Xu Wang, Hui Wang, Dezhan Chen, Bo Tang \*

5 Prof. B. Tang, Dr. M. Xue, X. Wang, H. Wang, D.Chen

6 College of Chemistry, Chemical Engineering and Materials Science, Engineering Research Center of Pesticide and  
7 Medicine Intermediate Clean Production, Ministry of Education, Key Laboratory of Molecular and Nano Probes,  
8 Ministry of Education, Shandong Normal University, Jinan 250014, P. R. China

9 Fax: (+86) 531-8618-0017

10 E-mail: [tangb@sdu.edu.cn](mailto:tangb@sdu.edu.cn)

11

12

|    |                              |          |
|----|------------------------------|----------|
| 13 | 1. Experimental Section      | pS2-pS3  |
| 14 | 2. Results and Discussion    | pS3-pS8  |
| 15 | 3. Theoretical Calculations. | pS8-pS13 |

16

17

18

19

20

21

22

23

24

25

26

27

28

29

30

31

32

33

34

35

36

## 1 **1. Experimental Section**

2 **Materials.** Hydrogen tetrachloroaurate (III) ( $\text{HAuCl}_4 \cdot 3\text{H}_2\text{O}$ ), trisodium citrate, cadmium acetate  
3 dihydrate (98.5%), tellurium powder (300 mesh, 99%), sodium hydrogen boride (99%) and  
4 potassium fluoride were purchased from China Medicine Group Shanghai Chemical Reagent  
5 Corporation. Thioglycolic acid (TGA) were obtained from Sigma-Aldrich. All other reagents were  
6 analytical reagent grade. Water used in the experiment was purified with Mill-Q ( $18.2 \text{ M}\Omega \cdot \text{cm}^{-1}$ )  
7 water system. 100k Nanosep filter (Pall Corporation, USA) was used as ultra-purification  
8 instrumentation.

9 **Instrumentation and methods.** Fluorimetric spectra were collected with an Edinburgh FLS920  
10 spectrofluorimeter (Edinburgh Instruments Ltd, England) equipped with a xenon lamp and a  
11 quartz cuvette (1.0 cm optical path) as the container. Absorption spectra were recorded on an  
12 UV-1700 spectrophotometer (Shimadzu Corp. Kyoto, Japan). Transmission electron microscopy  
13 (TEM) images were collected on a Hitachi Model H-800 instrument. Acidity measurements were  
14 made with a Model pHs-3C meter (Shanghai Leici Equipment Factory, China). Centrifugation  
15 was done on the instrument of Sigma 3K 15 Centrifuge. Capillary electrophoresis (CE) was  
16 performed by using a QL-1000 instrument with UV/Vis detector (Shandong Normal University).  
17 Experimental conditions: capillary with 50 cm effective (55 cm total) length and  $75 \mu\text{m}$  inner  
18 diameter.  $\text{Na}_2\text{B}_4\text{O}_7$  solution (20 mM, pH 9.2) was used as running buffer. The applied voltage was  
19 12 kV. The samples were introduced to the capillary by pressure for 10s.

### 20 **Preparation of water-soluble CdTe quantum dots (QDs) and its purification.**

#### 21 *Preparation of NaHTe.*

22 In a two-necked flask (25 mL), 11.3 mg tellurium powder and 10 mL water were deaerated with  
23 argon for 10 min. Then 30 mg  $\text{NaBH}_4$  was added and the resulting suspension was stirred under  
24 argon until  $\text{NaBH}_4$  was completely dissolved. After that, the resulting suspension was heated to 35  
25  $^\circ\text{C}$  under vigorous stirring and argon bubbling. During fifteen minutes, the colored suspension  
26 changed its characteristic color from violet to colorless. Fresh NaHTe was obtained and was  
27 cooled to room temperature.

#### 28 *Preparation and purification of TGA/ CdTe QDs.*

29 In a three-necked flask (250 mL) equipped with a reflux condenser, cadmium acetate dihydrate (2  
30 mmol) was dissolved in 100 mL water. After thioglycolic acid (TGA, 1.0 mmol) was added, the  
31 solution was adjusted to pH 10 with aqueous NaOH (1.0 M) and stirred under argon at room  
32 temperature for 30 min. Then 2mL NaHTe solution was injected under argon and the mixture was  
33 refluxed. The colour of the precursors mixture turned from colorless to orange, supporting the  
34 growth of the nanocrystals. After refluxing for particular time, stable water-compatible  
35 TGA-capped CdTe QDs were obtained.<sup>1</sup> To remove excess TGA, the as-prepared QDs were  
36 precipitated with an equivalent amount of 2-propanol. The pellet of purified QDs was dried  
37 overnight at room temperature in vacuum, and the final product in the powder form could be  
38 redissolved in ultrapure water (20 mL). The aggregated nanoparticles that formed in the process of  
39 redissolving were removed by ultrafiltration using 100k Nanosep filter under centrifugation  
40 ( $12000 \text{ rpm}$ , 5 min). The upper phase was discarded, leaving the obtained homogeneous QDs in  
41 lower phase as the stock solution. The obtained QDs were characterized by fluorescence  
42 spectroscopy and UV/Vis spectroscopy. According to the excitonic absorption peak value and the  
43 extinction coefficient per mole ( $\epsilon$ ) of CdTe nanoparticles<sup>2</sup> The final concentration of CdTe-QDs is

1  $6.4 \times 10^{-7}$  mol/L. We denote the concentration of purified QDs solution to be  $1 \times$ .

## 2 **Preparation of citrate modified Au nanoparticles (AuNPs).**

3 The monodispersed AuNPs was prepared using the classical citrate reduction route pioneered by  
4 Frens.<sup>3</sup> Briefly, trisodium citrate (1%, 5.25 mL) was added rapidly to an aliquot of 0.01% HAuCl<sub>4</sub>  
5 (150 mL) that was brought to a reflux while stirring. This mixture was refluxed for an additional  
6 15 min, during which time the color changed to deep red. Then the solution was set aside to cool  
7 to room temperature. This result in citrate ion stabilized AuNPs with net negative charges. Next,  
8 unbound citrate was removed by repeated centrifugation (12000 rpm, 5 min), followed by  
9 redispersing the red precipitate in ultrapure water (15 mL) to get the pure AuNPs. The AuNPs  
10 were characterized by UV/Vis absorption spectroscopy as well as transmission electron  
11 microscopy (TEM). The final concentration of AuNPs was calculated to be approximately 2.0 nM  
12 ( $1.2 \times 10^{15}$  particles/L)<sup>4</sup> with a high molar extinction coefficient ( $\epsilon$  at 520 nm) of  $6.1 \times 10^8$  M<sup>-1</sup> cm<sup>-1</sup>.  
13 Please note that we denote the concentration of the as-prepared AuNPs solution to be  $2 \times$ .

## 14 **Fluorescence quenching.**

15 100  $\mu$ L of the prepared CdTe QDs ( $0.1 \times$ ), 100  $\mu$ L of 0.10 M (pH=7.0) buffer solution and different  
16 concentrations of AuNPs solution were added to 1.50 mL colorimetric tube, sequentially. Each  
17 sample solution was diluted with pure water to a final volume of 1.00 mL. For an equilibration  
18 period of 20 min to make reaction completely, the fluorescence spectra were collected .

## 19 **Fluorescence detection of fluoride ion.**

20 100  $\mu$ L of 0.10 M (pH=7.0) buffer solution and 200  $\mu$ L of AuNPs solution ( $2 \times$ ) were added into  
21 100  $\mu$ L of the prepared CdTe QDs ( $0.1 \times$ ) as the probe solution. Equilibration period of 20 min was  
22 performed to make the reaction completely. Afterwards, different concentrations of F<sup>-</sup> were added.  
23 Each sample solution was diluted with pure water to a final volume of 1.00 mL. After 5 minutes'  
24 reaction, the fluorescence spectra were obtained .

## 26 **references**

- 27 1 B. Tang, F. Yang, Y. Lin, L. H. Zhuo, J. C. Ge and L. H. Cao, *Chem. Mater.*, 2007, **19**, 1212.  
28 2 W.W. Yu, L. Qu, W. Guo and X. Peng, *Chem. Mater.*, 2003, **15**, 2854.  
29 3 G. Frens, *Nat. Phys. Sci.* 1973, **241**, 20.  
30 4 S. J. Chen and H. T. Chang, *Anal. Chem.*, 2004, **76**, 3727.

## 32 **2. Results and Discussion**

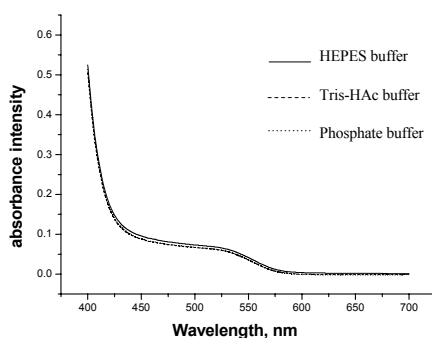

49 **Fig.S1** The absorption spectra of CdTe QDs ( $0.1 \times$ ). Solutions were prepared in 10 mM buffer solution (pH 7.0).

2  
4  
6  
8  
10  
12  
14  
16  
18  
19  
20

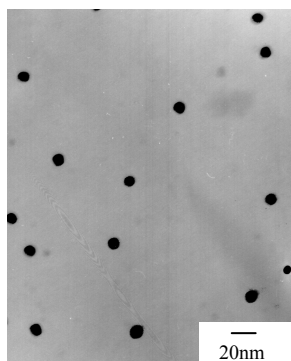

Fig.S2 TEM images of the as-synthesized AuNPs.

21 **Interactions between water-soluble CdTe QDs and AuNPs studied by fluorescence spectra.**

22 *Effect of acidity*

23 In order to monitor the fluorescence intensity changes related to pH variations, three buffer  
24 solutions are chosen, including sodium phosphate buffer, Tris-HAc buffer and HEPES buffer. The  
25 concentration of QDs was fixed to be  $0.1\times$ , volume was  $100\ \mu\text{L}$ . The concentration of AuNPs was  
26 fixed at  $2\times$ , volume was  $200\ \mu\text{L}$ . For phosphate buffer system, the effect of pH was in the range of  
27  $5.5\sim 9.0$ . In acid condition, fluorescence quenching is obvious(Fig. S3a). When increasing pH,  
28 fluorescence quenching efficiency decreased, but the fluorescence peak is still at  $520\ \text{nm}$ . Similar  
29 results was observed in Tris-HAc buffer solution ( $\text{pH}=7.0\sim 9.8$ ) and HEPES buffer solution  
30 ( $\text{pH}=6.4\sim 9.0$ ). Therefore, the pH of the solution play an important role in the interactions between  
31 water-soluble CdTe QDs and AuNPs. Finally, considering the stability of CdTe QDs and AuNPs, a  
32 buffer solution of pH 7.0 was recommended.

33 *Effect of buffer concentration*

34 When the concentration of phosphate buffer solution was more than  $25\ \text{mM}$ , the solution  
35 color changed from red to light purple. For Tris-HAc buffer solution, the solution color turned to  
36 light purple when the concentration was  $30\ \text{mM}$ . However, for HEPES buffer, the solution color  
37 changed a little even when the concentration reached  $30\ \text{mM}$ . These results indicated that the  
38 concentration of buffer solution affects the stabilization of AuNPs. In the high ionic strength  
39 solutions, the solution color changed from red to light purple resulted from the self-aggregation of  
40 AuNPs. While in HEPES buffer, AuNPs are relatively stable due to the non-ionic property of the  
41 buffer. As shown in Fig. S3b, fluorescence quenching efficiency of AuNPs decreased with the  
42 increasing of buffer concentration. In the following experiments,  $10\ \text{mM}$  buffer solution (pH 7.0)  
43 was chosen.

44 *The concentration ratio of the CdTe QDs to AuNPs*

45 Fig. S3c shows the effect of AuNPs amounts on photoluminescence (PL) intensity during  
46 adding  $50\sim 300\ \mu\text{L}$  of  $2\ \text{nM}$  ( $2\times$ ) AuNPs. When the concentration and volume of QDs is stabilized  
47 at  $0.1\times$  and  $100\ \mu\text{L}$ , a regular decrease in the fluorescence emission of QDs was observed. The  
48 experiment results show that the fluorescence quenching efficiency of AuNPs is almost same in  
49 different buffer solutions.

50 *Effect of interaction time*

51 Fig. S3d shows the decrease of fluorescence intensity along time after adding AuNPs to the  
52 QDs solution in the presence of  $10\ \text{mM}$  buffer solutions. The fluorescence intensity gradually

1 decreased along the reaction time and reached a plateau after 15 min. Therefore, reaction time of 20  
2 min was selected to obtain the best sensitivity.

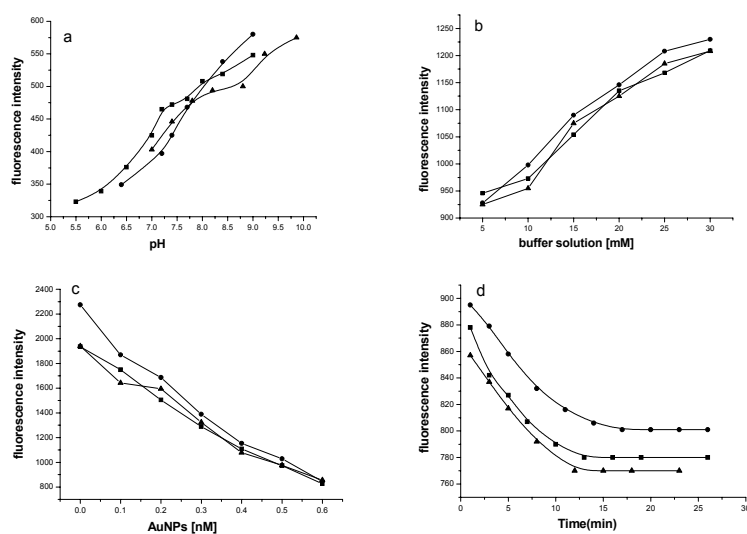

3  
4  
5  
6  
7  
8  
9  
10  
11  
12  
13  
14  
15  
16  
17  
18  
19  
20  
21  
22  
23  
24  
25  
26  
27  
28  
29  
30  
31  
32  
33  
34  
35  
36  
37  
38  
39  
40  
41 **Fig.S3** In all the experiments, CdTe QDs are fixed at  $0.1 \times 100 \mu\text{L}$ . (■) phosphate buffer, (▲) Tris-HAc buffer, (●)  
42 HEPES buffer. (a) Effects of pH (5.5~10.0) on the fluorescence spectra of CdTe-AuNPs assemblies. AuNPs( $2 \times$ ,  
43  $200 \mu\text{L}$ ). Three buffer concentrations are fixed at 10 mM; (b) Effect of buffer concentrations on the fluorescence  
44 spectra of CdTe-AuNPs assemblies, AuNPs( $2 \times, 200 \mu\text{L}$ ), pH 7.0; (c) PL quenching of CdTe QDs upon adding  
45 AuNPs, three buffer concentrations are fixed at 10 mM, pH 7.0; (d) The changes of fluorescence intensity with  
46 increasing incubation time. AuNPs ( $2 \times, 200 \mu\text{L}$ ). Three buffer concentrations are fixed at 10 mM, pH 7.0.

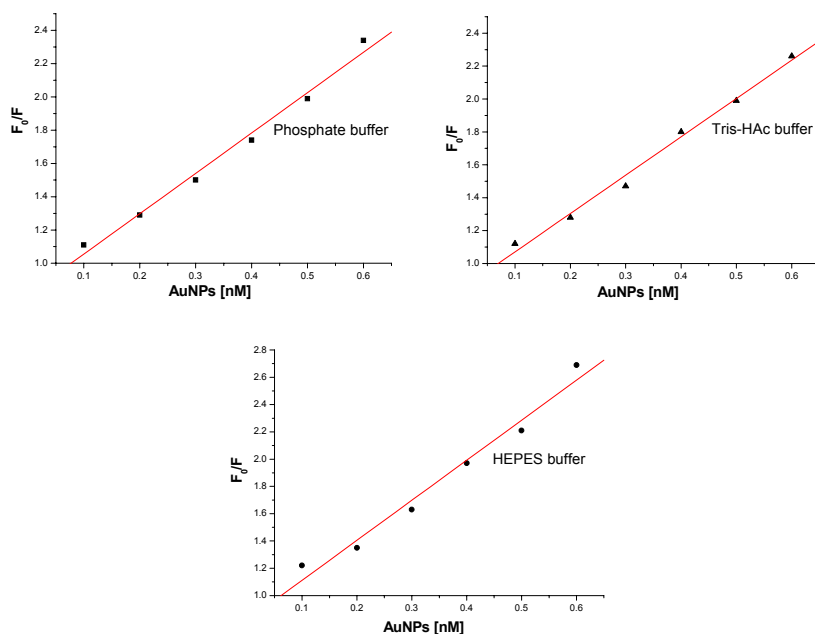

47  
48  
49  
50  
51  
52  
53  
54  
55  
56  
57  
58  
59  
60  
61  
62  
63  
64  
65  
66  
67  
68  
69  
70  
71  
72  
73  
74  
75  
76  
77  
78  
79  
80 **Fig.S4** Stern-Volmer plot of  $F_0/F$  versus [AuNPs]. The buffer concentration is fixed at 10 mM, pH 7.0.

81  
82 Fig.S5 shows the electropherograms of free QDs in different pH by capillary electrophoresis  
83 obtained with a UV-visible detector at 350 nm. In the alkaline buffer solution, CdTe QDs possess  
84 negative charges and migrate to the anode in the electric field. As pH decreased, the QDs was

1 detected at a longer migration time. This indicated that the negative charges on the surface of  
2 CdTe QDs decreased.

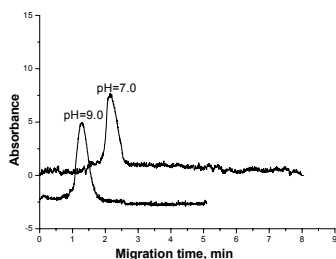

20 Fig.S5 Electropherograms of CdTe QDs( $0.10\text{mg}\cdot\text{ml}^{-1}$ ) obtained by capillary electrophoresis at 350 nm.

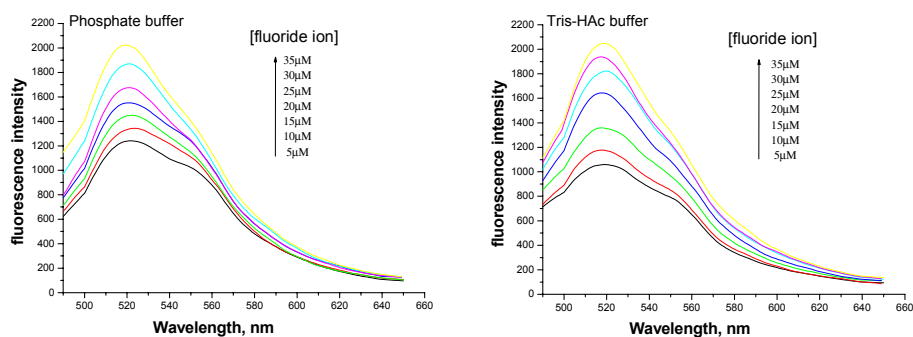

43 Fig.S6 Fluorescence response after different concentrations of  $\text{F}^-$  were added to the analytical system in the  
44 optimal conditions. The buffer concentration is fixed at 10 mM, pH 7.0.

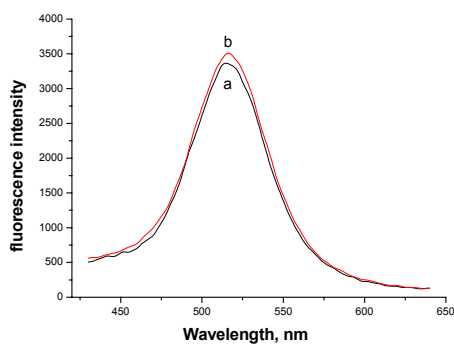

66 Fig. S7 (a) Fluorescence spectra of CdTe QDs ( $0.1\times$ ). (b) Fluorescence response after  $\text{F}^-$  ( $50\mu\text{M}$ ) were added to the  
67 QDs solution. Solutions were prepared in 10 mM HEPES buffer solution (pH 7.0).

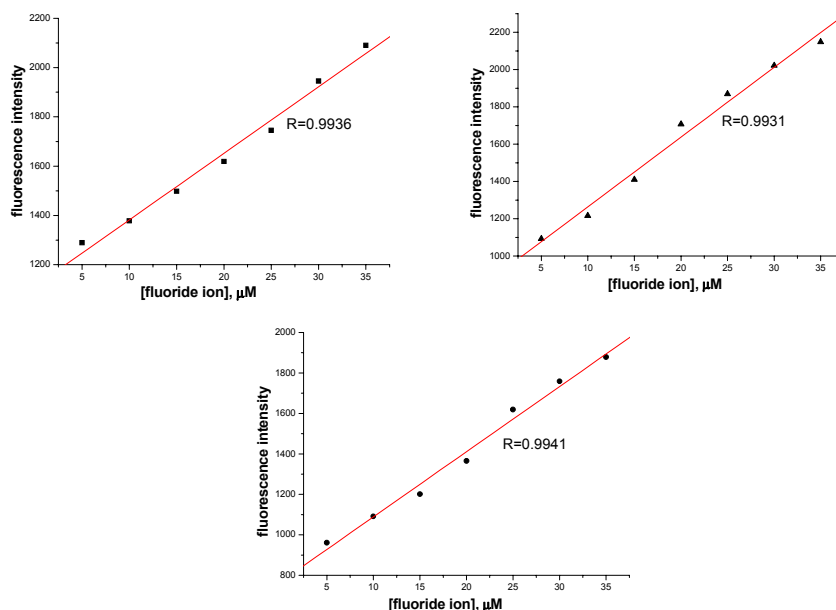

**Fig. S8** A linear correlation between the fluorescence intensity and the concentrations of  $F^-$ . (■) Phosphate buffer, (▲) Tris-HAc buffer, (●) HEPES buffer.

**Table S1.** The detection limit and the relative standard deviation (RSD).

|                 | Phosphate buffer | Tris-HAc buffer | HEPES buffer |
|-----------------|------------------|-----------------|--------------|
| Detection limit | 115 nM           | 84 nM           | 97 nM        |
| RSD ( $n=11$ )  | 2.1 %            | 1.8 %           | 1.1 %        |

#### Effects of various anions and cations on the nanoprobe.

To assess the selectivity of the assemblies for  $F^-$ , the effects of various anions and cations on the determination of  $F^-$  were examined in the tested three buffer solutions. Although the nano-assemblies can detect  $F^-$  in phosphate buffer solution, AuNPs became unstable after adding higher concentration of anions, which may be due to the high ionic strength of solution. For Tris-HAc buffer solution, the influence was much better. In HEPES buffer solution, the influence was small. Finally, HEPES buffer was chosen. Table S2 shows that the relative error of most species in HEPES buffer solution.

**Table S2.** Interferences of various coexisting anions and cations in the presence of 20  $\mu M$   $F^-$  (HEPES buffer).

| Coexisting substances         | Concentration / mol·L <sup>-1</sup> | Relative error / % |
|-------------------------------|-------------------------------------|--------------------|
| Cl <sup>-</sup>               | $5.0 \times 10^{-4}$                | 1.5                |
| Br <sup>-</sup>               | $5.0 \times 10^{-4}$                | 1.3                |
| I <sup>-</sup>                | $5.0 \times 10^{-4}$                | 1.2                |
| SO <sub>4</sub> <sup>2-</sup> | $5.0 \times 10^{-4}$                | 0.5                |

|                                  |                      |      |
|----------------------------------|----------------------|------|
| NO <sub>3</sub> <sup>-</sup>     | 5.0×10 <sup>-4</sup> | 0.6  |
| CH <sub>3</sub> COO <sup>-</sup> | 5.0×10 <sup>-4</sup> | 1.8  |
| HCO <sub>3</sub> <sup>-</sup>    | 5.0×10 <sup>-4</sup> | 2.7  |
| HPO <sub>4</sub> <sup>2-</sup>   | 5.0×10 <sup>-4</sup> | 2.4  |
| NO <sub>2</sub> <sup>-</sup>     | 5.0×10 <sup>-4</sup> | 0.3  |
| Na <sup>+</sup>                  | 1.0×10 <sup>-3</sup> | -0.4 |
| K <sup>+</sup>                   | 1.0×10 <sup>-3</sup> | -0.9 |
| Ag <sup>+</sup>                  | 1.0×10 <sup>-3</sup> | -1.6 |
| Mg <sup>2+</sup>                 | 1.0×10 <sup>-3</sup> | -2.2 |
| Ca <sup>2+</sup>                 | 1.0×10 <sup>-3</sup> | -2.8 |
| Fe <sup>2+</sup>                 | 1.0×10 <sup>-3</sup> | -1.8 |
| Zn <sup>2+</sup>                 | 1.0×10 <sup>-3</sup> | -1.5 |
| Cu <sup>2+</sup>                 | 1.0×10 <sup>-3</sup> | -2.4 |
| Hg <sup>2+</sup>                 | 1.0×10 <sup>-3</sup> | -2.8 |
| Al <sup>3+</sup>                 | 1.0×10 <sup>-3</sup> | -1.5 |
| Fe <sup>3+</sup>                 | 1.0×10 <sup>-3</sup> | -2.2 |

1  
2  
3  
4

**Table S3.** Analytical results of F<sup>-</sup> in tap water samples (HEPES buffer).

|           | Measured <sup>a</sup><br>(μM) | Added<br>(μM) | Recovered <sup>a</sup><br>(μM) | RSD<br>(%) | Recovery<br>(%) | Measured <sup>b</sup><br>(μM) |
|-----------|-------------------------------|---------------|--------------------------------|------------|-----------------|-------------------------------|
| Tap water | 20.92                         | 10.00         | 31.17                          | 1.2        | 102             | 20.85                         |

5  
6  
7  
8

<sup>a</sup> Mean value of six determinations by the proposed method.

<sup>b</sup> Mean value of six determinations by using electrodes prepared from LaF<sub>3</sub>.

9

### 3. Theoretical Calculations

10 Calculated geometries were initially optimized with the Gaussian 03<sup>1</sup> package at the DFT level  
11 of theory by using the B3LYP functional <sup>2</sup>(Becke's three parameters hybrid functional <sup>3</sup> with the  
12 Lee-Yang-Parr correlation functional <sup>4</sup>) and the 6-31+G(d,p) basis set. The resulting stationary  
13 points were confirmed by frequency calculations. Reported total electronic energies are  
14 uncorrected for the ZPVE (zero point vibrational energy) and computed in the gas-phase. Bond  
15 orders were characterized by the Wiberg's bond index <sup>5</sup> (WBI) and calculated at the  
16 B3LYP/6-311G\*\* level with the natural bond orbital (NBO) method <sup>6</sup> as the sum of squares of the  
17 off-diagonal density matrix elements between atoms, as formulated in terms of the natural atomic  
18 orbital (NAO) basis set.

19

### 20 references

21 1 M. J. Frisch, G.W.Trucks, H. B. Schlegel, G.E.Scuseria, M.A.Robb, J. R.Cheeseman, J.A.Jr.Montgomery,  
22 T.Vreven, K.N.Kudin, J.C.Burant, J. M.Millam, S.S.Iyengar, J.Tomasi, V.Barone, B.Mennucci, M.Cossi, G.  
23 Scalmani, N.Regga, G. A.Petersson, H. Nakatsuji, M.Hada, M. Ehara, K.Toyota, R.Fukuda, J.Hasegawa, M.Ishida,  
24 T.Nakajima, Y.Honda, O.Kitao, H.Nakai, M.Klene, X.Li, J. E.Knox, H. P.Hratchian, J. B.Cross, V.Bakken,  
25 C.Adamo, J.Jaramillo, R.Gomperts, R.E.Stratmann, O.Yazyev, A. J.Austin, R.Cammi, C.Pomelli, J.



- 1 W.Ochterski, P. Y.Ayala, K.Morokuma, G. A.Voth, P.Salvador, J. J.Dannenberg, V. G.Zakrzewski, S.Dapprich, A.  
2 D.Daniels, M. C.Strain, O.Farkas, D. K.Malick, A.D.Rabuck, K.Raghavachari, J. B.Foresman, J. V.Ortiz, Q.Cui,  
3 A.G.Baboul, S.Clifford, J.Cioslowski, B. B. Stefanov, G. Liu, A.Liashenko, P. Piskorz, I. Komaromi, R. L.Martin,  
4 D. J.Fox, T.Keith, M. A.Al-Laham, C.Y.Peng, A.Nanayakkara, M.Challacombe, P. M. W.Gill, B.Johnson,  
5 W.Chen, M. W.Wong, C.Gonzalez, J. A.Pople, *Gaussian03*, revision B.03,Gaussian, Inc., Wallingford, CT, 2004.  
6 2 L.J.Bartolotti and K.Fluchick, In *Reviews in Computational Chemistry*; K. B.Lipkowitz, B. D.Boyd, Eds., VCH:  
7 New York, 1996, Vol. 7, pp 187-216.  
8 3 A.D.Becke, *J. Chem. Phys.*, 1993, **98**, 5648.  
9 4 C.Lee, W.Yang and R.G.Parr, *Phys. Rev. B*, 1988, **37**, 785.  
10 5 K.Wiberg, *Tetrahedron*, 1968, **24**, 1083.  
11 6 J.P. Foster and F. Weinhold, *J. Am. Chem. Soc.*, 1980, **102**, 7211.

12

13 **Calculated structures, energies and cartesian coordinates (B3LYP/6-31+G\*\*) for model**  
14 **compounds and relevant complexes.**

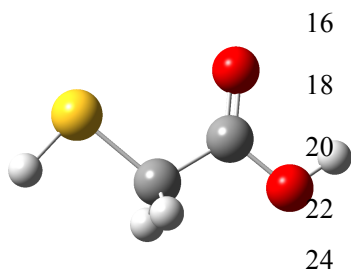

25

26 E = -627.283884 au

|    |   |             |             |             |
|----|---|-------------|-------------|-------------|
| 27 | C | -0.96037300 | 0.10671300  | 0.00040400  |
| 28 | O | -0.92755900 | 1.31567500  | 0.00000100  |
| 29 | O | -2.11635600 | -0.60309600 | -0.00020400 |
| 30 | H | -2.84786000 | 0.03789000  | -0.00050700 |
| 31 | C | 0.23344100  | -0.82270500 | 0.00016400  |
| 32 | S | 1.78996300  | 0.15139200  | -0.00008100 |
| 33 | H | 2.58963400  | -0.93558100 | -0.00030200 |
| 34 | H | 0.16601000  | -1.46464900 | 0.88369700  |
| 35 | H | 0.16571200  | -1.46461800 | -0.88336900 |

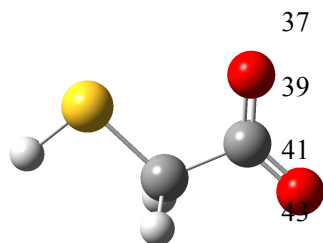

45

46

47 E = -626.7377697 au

|    |   |            |             |             |
|----|---|------------|-------------|-------------|
| 48 | C | 1.10947100 | 0.08806300  | 0.00002200  |
| 49 | O | 0.90871700 | 1.32597300  | 0.00001300  |
| 50 | O | 2.18741400 | -0.56204800 | -0.00002200 |

|   |   |             |             |             |
|---|---|-------------|-------------|-------------|
| 1 | C | -0.15461100 | -0.83669800 | 0.00001300  |
| 2 | S | -1.73048000 | 0.14146400  | -0.00001700 |
| 3 | H | -2.56434100 | -0.93084600 | 0.00012000  |
| 4 | H | -0.12308700 | -1.47607900 | -0.88696500 |
| 5 | H | -0.12310300 | -1.47608400 | 0.88698500  |

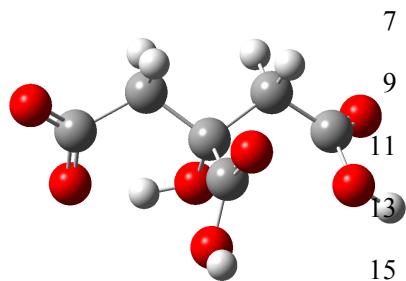

16 E= -759.5891344 au

|    |   |             |             |             |
|----|---|-------------|-------------|-------------|
| 17 | C | -0.01439800 | -0.22275900 | -0.11678800 |
| 18 | C | 1.23029200  | -0.73284700 | -0.88679200 |
| 19 | H | 1.10098100  | -1.79544000 | -1.09661400 |
| 20 | H | 1.31879400  | -0.18704400 | -1.83305900 |
| 21 | C | -1.30723300 | -0.68064100 | -0.85872200 |
| 22 | H | -1.18793100 | -1.74924100 | -1.08133900 |
| 23 | H | -1.41988900 | -0.14978800 | -1.80699200 |
| 24 | C | -2.62860300 | -0.55259300 | -0.03035400 |
| 25 | C | 2.53275400  | -0.60036700 | -0.13449800 |
| 26 | O | -2.49879500 | -0.69576600 | 1.23293900  |
| 27 | O | 3.34239700  | -1.49195700 | 0.04016900  |
| 28 | O | 2.76640200  | 0.66049600  | 0.31404100  |
| 29 | H | 3.59405100  | 0.62080700  | 0.82047500  |
| 30 | O | 0.03054500  | -0.74329000 | 1.18075300  |
| 31 | H | -0.95372300 | -0.77741600 | 1.45567100  |
| 32 | C | -0.00404900 | 1.32607900  | -0.14972100 |
| 33 | O | 0.17215800  | 1.98577400  | -1.16114600 |
| 34 | O | -0.26077700 | 1.90627600  | 1.03847000  |
| 35 | H | -0.29709100 | 2.86087500  | 0.86062500  |
| 36 | O | -3.67790100 | -0.37703100 | -0.67741600 |

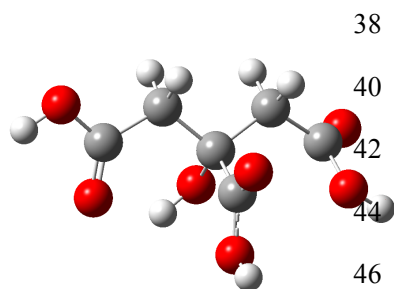

47

48 E=-760.1174145 au

|    |   |             |             |             |
|----|---|-------------|-------------|-------------|
| 1  | C | 0.02380600  | -0.28992900 | -0.00022600 |
| 2  | C | 1.23164300  | -0.95556800 | -0.69959300 |
| 3  | H | 1.12395600  | -2.03911700 | -0.62880000 |
| 4  | H | 1.23519300  | -0.66469800 | -1.75537800 |
| 5  | C | -1.26793400 | -0.90825600 | -0.59387100 |
| 6  | H | -1.22379700 | -1.99704100 | -0.47454600 |
| 7  | H | -1.34536200 | -0.69693900 | -1.66416100 |
| 8  | C | -2.52911300 | -0.43059000 | 0.08805800  |
| 9  | C | 2.58199400  | -0.61613700 | -0.09981800 |
| 10 | O | -2.57361200 | 0.24274200  | 1.10123400  |
| 11 | O | 3.38670100  | -1.42907500 | 0.29619500  |
| 12 | O | 2.82423200  | 0.71700000  | -0.09821800 |
| 13 | H | 3.69495600  | 0.85222500  | 0.31266000  |
| 14 | O | 0.14824300  | -0.57183300 | 1.37549700  |
| 15 | H | -0.57768300 | -0.12321300 | 1.83968500  |
| 16 | C | 0.00683600  | 1.22600400  | -0.31380500 |
| 17 | O | -0.14531900 | 1.65816200  | -1.43840300 |
| 18 | O | 0.13825800  | 2.00461100  | 0.77056200  |
| 19 | H | 0.09859300  | 2.92764900  | 0.46674300  |
| 20 | O | -3.63869300 | -0.85634600 | -0.54859500 |
| 21 | H | -4.40772500 | -0.53410700 | -0.04684900 |

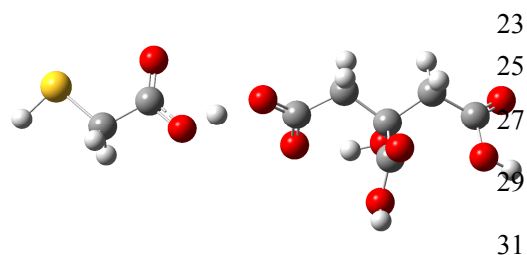

|    |                    |             |             |             |
|----|--------------------|-------------|-------------|-------------|
| 32 | E=-1386.9093501 au |             |             |             |
| 33 | C                  | -2.52344000 | -0.21249700 | 0.08305100  |
| 34 | C                  | -3.70352000 | -0.98027500 | 0.72497200  |
| 35 | H                  | -3.43511700 | -2.03425700 | 0.80825900  |
| 36 | H                  | -3.89162500 | -0.57749200 | 1.72645300  |
| 37 | C                  | -1.20768900 | -0.58403600 | 0.82623100  |
| 38 | H                  | -1.15454900 | -1.67918700 | 0.87022700  |
| 39 | H                  | -1.22045600 | -0.20644300 | 1.85091300  |
| 40 | C                  | 0.08524100  | -0.11511600 | 0.11836500  |
| 41 | C                  | -4.99283800 | -0.92546300 | -0.06149900 |
| 42 | O                  | 0.07452900  | -0.02513700 | -1.13549600 |
| 43 | O                  | -5.66702400 | -1.88704500 | -0.37489100 |
| 44 | O                  | -5.37933900 | 0.34099400  | -0.36088300 |
| 45 | H                  | -6.18515300 | 0.26437100  | -0.89771000 |
| 46 | O                  | -2.46267300 | -0.57508000 | -1.27116000 |
| 47 | H                  | -1.51900900 | -0.38072500 | -1.53806300 |

|    |   |             |             |             |
|----|---|-------------|-------------|-------------|
| 1  | C | -2.74919300 | 1.30595300  | 0.29281600  |
| 2  | O | -3.01244600 | 1.80597800  | 1.37243500  |
| 3  | O | -2.57862900 | 2.04618300  | -0.81789100 |
| 4  | H | -2.67728800 | 2.97206500  | -0.53941400 |
| 5  | O | 1.07072500  | 0.09727600  | 0.89057400  |
| 6  | H | 2.34301000  | 0.41454500  | 0.37283500  |
| 7  | O | 3.29266800  | 0.78727800  | 0.03173900  |
| 8  | C | 4.31505300  | -0.02277700 | 0.16251500  |
| 9  | O | 4.32543100  | -1.13565700 | 0.66972200  |
| 10 | C | 5.57537200  | 0.61372500  | -0.43366000 |
| 11 | S | 7.03674500  | -0.47597400 | -0.17073700 |
| 12 | H | 5.40623500  | 0.77503100  | -1.50186000 |
| 13 | H | 5.73365700  | 1.58758900  | 0.03667200  |
| 14 | H | 7.91252000  | 0.36467000  | -0.76645900 |

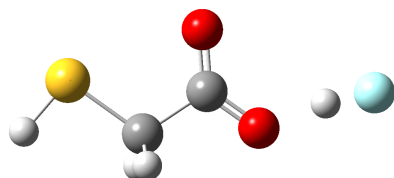

26 E= -727.2324566au

|    |   |             |             |             |
|----|---|-------------|-------------|-------------|
| 27 | C | 0.00000000  | 0.00000000  | 0.00000000  |
| 28 | O | 0.00000000  | 0.00000000  | 1.24036380  |
| 29 | O | 0.98862448  | 0.00000000  | -0.81048234 |
| 30 | H | 2.36841312  | 0.01246771  | -0.41992939 |
| 31 | C | -1.35545923 | 0.00035299  | -0.75259712 |
| 32 | S | -2.77867870 | 0.00148495  | 0.42725481  |
| 33 | H | -3.73830895 | 0.00041239  | -0.53009986 |
| 34 | H | -1.40175146 | 0.88599721  | -1.39213873 |
| 35 | H | -1.40247176 | -0.88597729 | -1.39117034 |
| 36 | F | 3.36831961  | 0.02717314  | -0.27724966 |

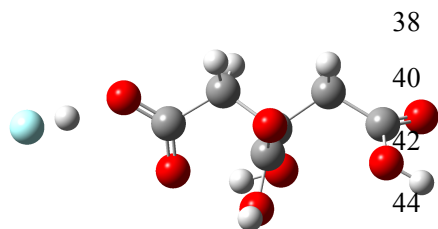

46

|    |                 |            |             |             |
|----|-----------------|------------|-------------|-------------|
| 47 | E= -860.07928au |            |             |             |
| 48 | C               | 0.52134400 | -0.22494800 | -0.10182900 |
| 49 | C               | 1.75124400 | -0.78849900 | -0.85364800 |

|    |   |             |             |             |
|----|---|-------------|-------------|-------------|
| 1  | H | 1.60358100  | -1.85655400 | -1.01918300 |
| 2  | H | 1.84250200  | -0.28446200 | -1.82235000 |
| 3  | C | -0.77689700 | -0.68590200 | -0.82649500 |
| 4  | H | -0.69517800 | -1.76921600 | -0.98308400 |
| 5  | H | -0.86421200 | -0.21089000 | -1.80615800 |
| 6  | C | -2.08472600 | -0.46026100 | -0.02353100 |
| 7  | C | 3.06240600  | -0.64590900 | -0.11627200 |
| 8  | O | -2.00870600 | -0.48567700 | 1.23374400  |
| 9  | O | 3.86071000  | -1.54196100 | 0.07945800  |
| 10 | O | 3.31232400  | 0.62648000  | 0.28523600  |
| 11 | H | 4.14703200  | 0.60048000  | 0.78112000  |
| 12 | O | 0.56566800  | -0.70578300 | 1.21505400  |
| 13 | H | -0.38793800 | -0.66033800 | 1.52492900  |
| 14 | C | 0.56096000  | 1.32167700  | -0.18318700 |
| 15 | O | 0.72289100  | 1.93945900  | -1.22146200 |
| 16 | O | 0.34873500  | 1.94026500  | 0.99264900  |
| 17 | H | 0.32586900  | 2.89118300  | 0.79337500  |
| 18 | O | -3.12545400 | -0.31768200 | -0.72790200 |
| 19 | H | -4.49112200 | -0.21111900 | -0.18779900 |
| 20 | F | -5.45509600 | -0.13742600 | 0.05496700  |
| 21 |   |             |             |             |
| 22 |   |             |             |             |
| 23 |   |             |             |             |
